# Supplementary material for: Simple synthesis of [Ru(CO3)(NHC)(p-cymene)] complexes and their use in transfer hydrogenation catalysis
Source: Royal Society of Chemistry journal article supplement (doi:10.1039/d1dt02098f), 2021-01-01
Supplement: d1dt02098f1.pdf [file d1dt02098f1.pdf]

## SUPPORTING INFORMATION

---

### Supporting Information

#### **Simple synthesis of [Ru(CO<sub>3</sub>)(NHC)(*p*-cymene)] complexes and their use in transfer hydrogenation catalysis**

Xinyuan Ma, Sébastien G. Guillet, Yaxu Liu, Catherine S. J. Cazin and Steven P. Nolan \*

*Department of Chemistry and Centre for Sustainable Chemistry,*

*Ghent University, Ghent, 9000, Belgium*

E-mail: [steven.nolan@ugent.be](mailto:steven.nolan@ugent.be)

## SUPPORTING INFORMATION

---

|                                                                      |           |
|----------------------------------------------------------------------|-----------|
| <b>Synthesis of IMe·HBF<sub>4</sub></b> .....                        | <b>2</b>  |
| <b>Selected Optimization of the Reaction Conditions</b> .....        | <b>3</b>  |
| <i>Table S1 Optimization of the reaction conditions for 3a</i> ..... | <i>4</i>  |
| <b>NMR spectra</b> .....                                             | <b>4</b>  |
| <b>References</b> .....                                              | <b>18</b> |

### Synthesis of IMe·HBF<sub>4</sub>

## SUPPORTING INFORMATION

---

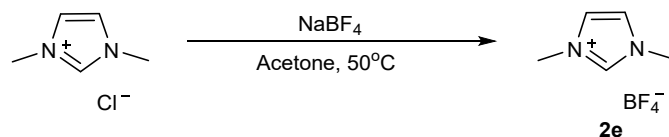

The synthesis process is similar to the literature.<sup>1</sup> In a 20 mL vial, 132.6 mg of IMe-HCl (1 mmol, 1 eq.) and 164.6 mg of NaBF<sub>4</sub> (1.2 mmol, 1.2 eq.) were stirred in 2 mL of acetone at 50 °C for 6 hours. The mixture was allowed to cool down to room temperature, filtered the suspension and washed the solid by 2 mL of acetone. The filtrate was collected and added extra 82.4 mg of NaBF<sub>4</sub> (0.75 mmol, 0.75 eq.) to the solvent, stirred at 50 °C for 3h. Filtered through a microfilter and washed with 6 mL of acetone (3 x 2 mL), and concentrated under reduced pressure. The product was dried in high vacuum overnight. Yield of product is 81 %.

<sup>1</sup>H NMR (300 MHz, Acetone) δ 8.90 (s, 1H, N=CHN), 7.66 (d, *J* = 1.6 Hz, 2H, CH=CH), 4.02 (d, *J* = 0.5 Hz, 7H, NCH<sub>3</sub>). <sup>19</sup>F NMR: δ -153.24 (s, 4F, BF<sub>4</sub>).

### Selected Optimization of the Reaction Conditions

## SUPPORTING INFORMATION

Table S1 Optimization of the reaction conditions for hydrogenation.

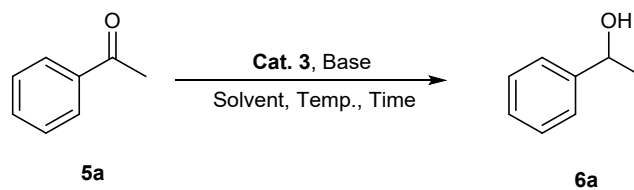

| Entry | Ru-NHC              | Base                                  | Solvent          | T(°C) | Time (h) | Yield (%) <sup>b</sup> |
|-------|---------------------|---------------------------------------|------------------|-------|----------|------------------------|
| 1     | <b>3a</b>           | NaOH (20%)                            | <i>i</i> PrOH    | 100   | 16       | 84                     |
| 2     | <b>3a</b>           | K <sup>t</sup> BuO (20%)              | <i>i</i> PrOH    | 100   | 16       | 91                     |
| 3     | <b>3a</b>           | K <sub>3</sub> PO <sub>4</sub> (20 %) | <i>i</i> PrOH    | 100   | 16       | trace                  |
| 4     | <b>3a</b>           | K <sub>2</sub> CO <sub>3</sub> (20%)  | <i>i</i> PrOH    | 100   | 16       | 47                     |
| 5     | <b>3a</b>           | KOH (10%)                             | <i>i</i> PrOH    | 100   | 16       | 93                     |
| 6     | <b>3a</b>           | KOH (5%)                              | <i>i</i> PrOH    | 100   | 16       | 76                     |
| 7     | <b>3a</b>           | KOH (5%)                              | <i>i</i> PrOH    | 100   | 36       | 83                     |
| 8     | <b>3a</b>           | KOH (2.5%)                            | <i>i</i> PrOH    | 100   | 16       | 56                     |
| 9     | -                   | KOH (10%)                             | <i>i</i> PrOH    | 80    | 4        | 25                     |
| 10    | <b>3e</b>           | KOH (10%)                             | EtOH             | 80    | 4        | -                      |
| 11    | <b>3e</b>           | KOH (10%)                             | MeOH             | 80    | 4        | -                      |
| 12    | <b>3e</b>           | KOH (10%)                             | H <sub>2</sub> O | 80    | 4        | -                      |
| 13    | <b>3e(2 mol%)</b>   | KOH (10%)                             | <i>i</i> PrOH    | 80    | 2        | 94                     |
| 14    | <b>3e(0.5 mol%)</b> | KOH (10%)                             | <i>i</i> PrOH    | 80    | 2        | 61                     |

<sup>a</sup> Reaction conditions: **5a** (0.5 mmol, 1 eq.), **3** (1 mol%), Base, Solvent (1.5 mL) in a 4 mL vial. <sup>b</sup> NMR yields using 1,3,5-trimethoxybenzene as internal standard.

### NMR spectra

# SUPPORTING INFORMATION

## $^1\text{H}$ and $^{19}\text{F}$ NMR of $\text{IMe}\cdot\text{HBF}_4$ (**2e**)

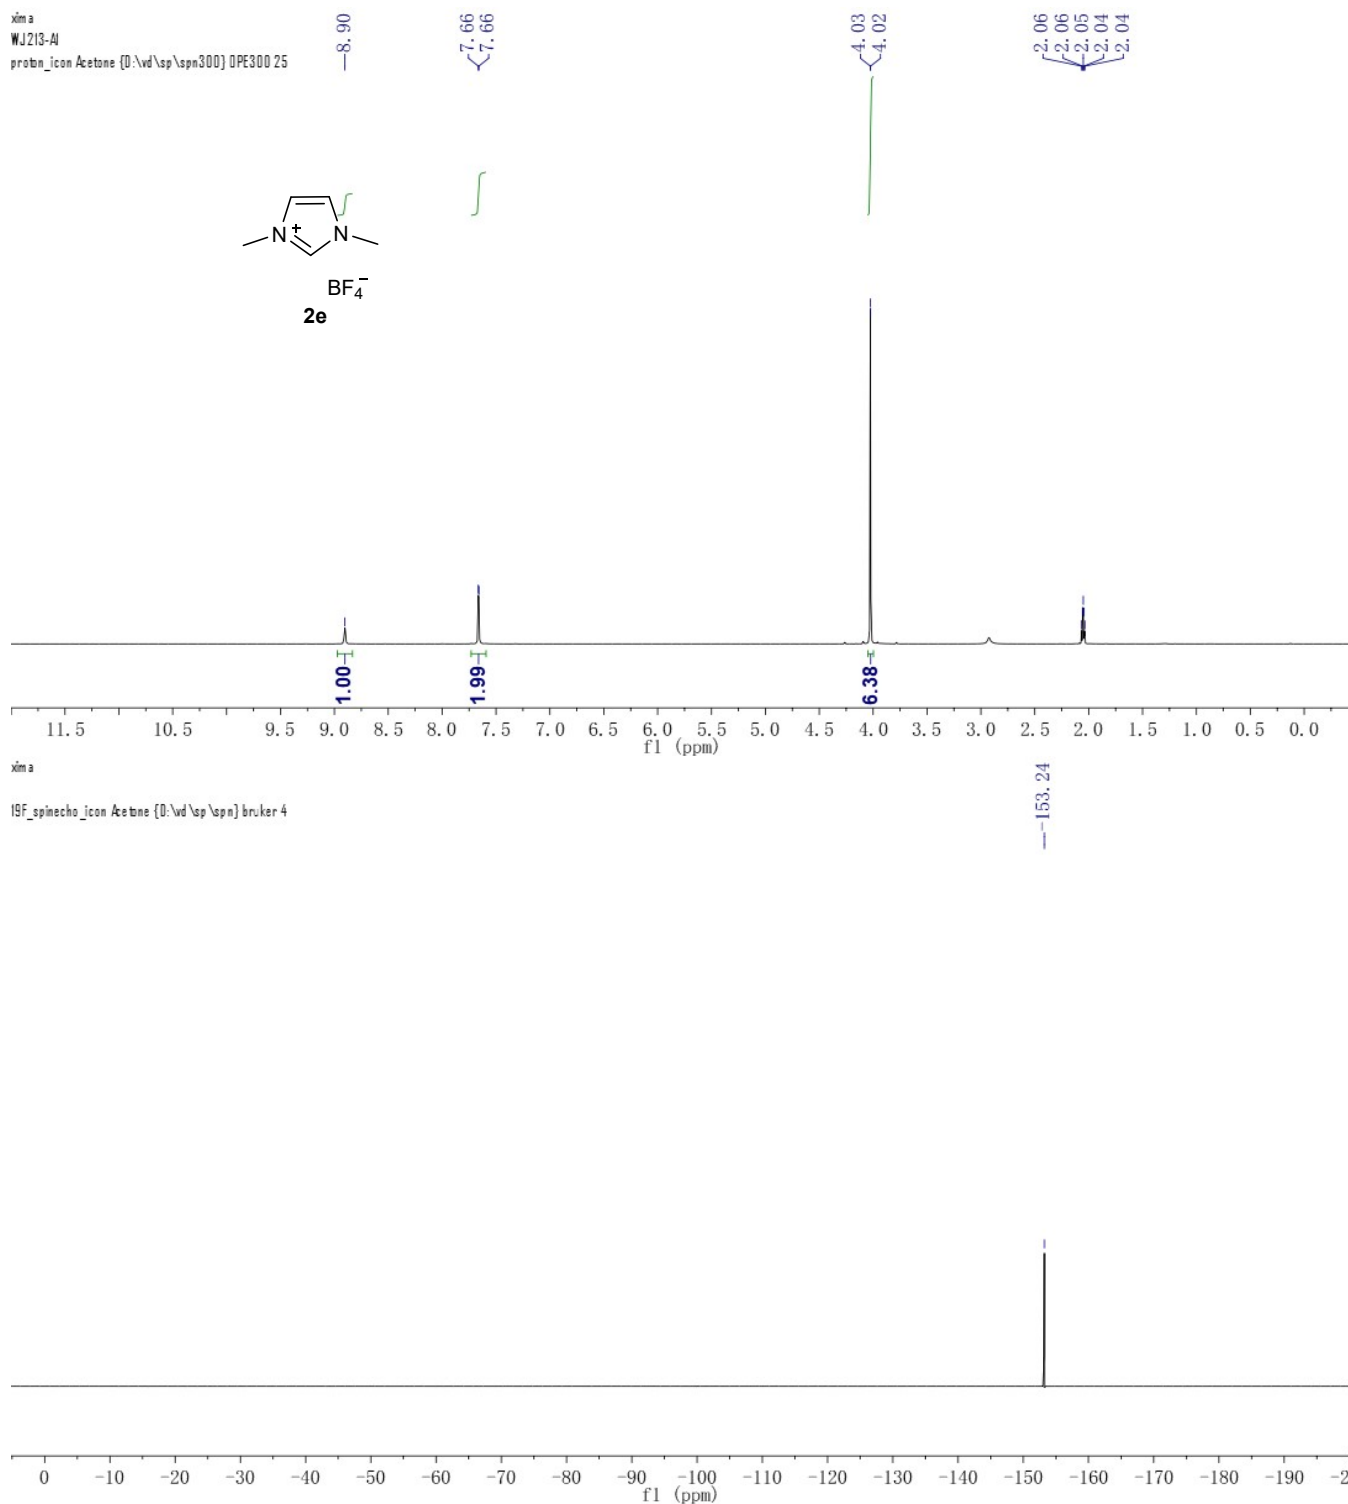

## $^1\text{H}$ and $^{13}\text{C}$ { $^1\text{H}$ } apt NMR of $[\text{Ru}(\text{CO}_3)(\text{IPr})(p\text{-cymene})]$ (**3a**)

# SUPPORTING INFORMATION

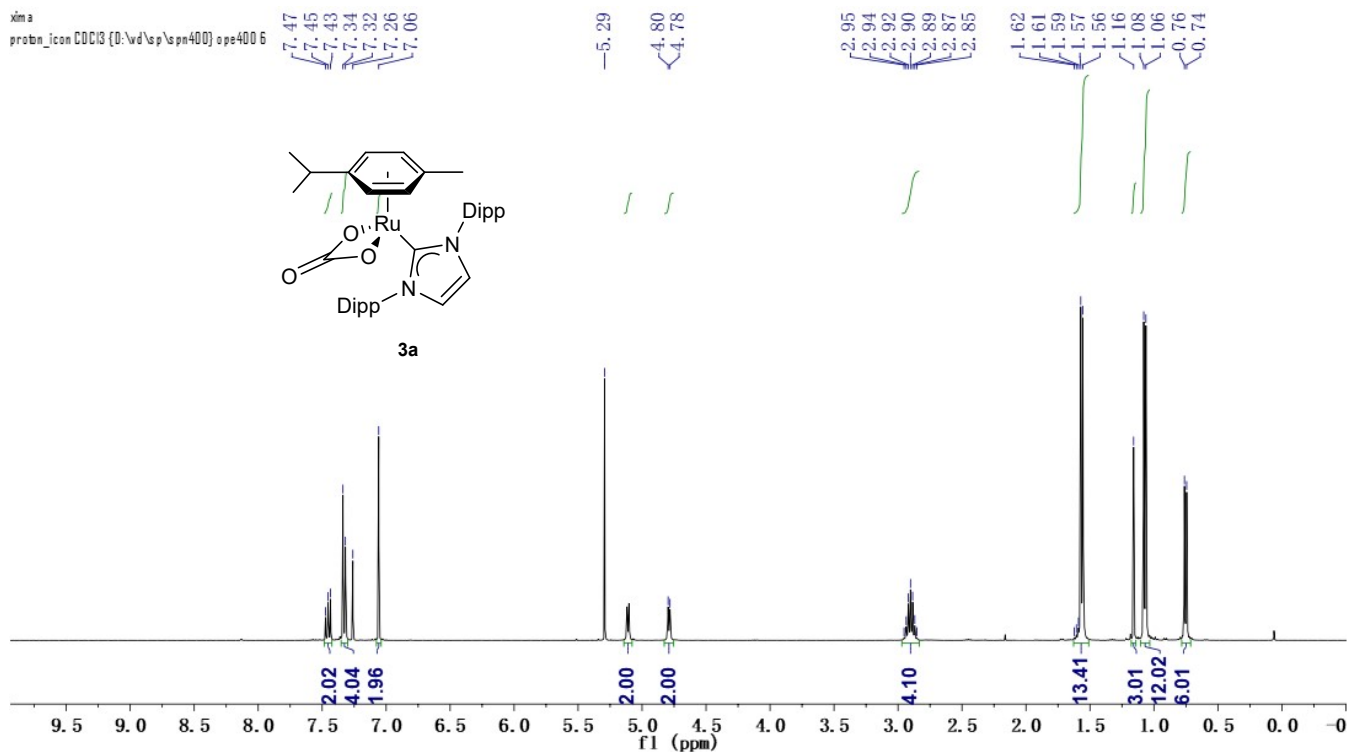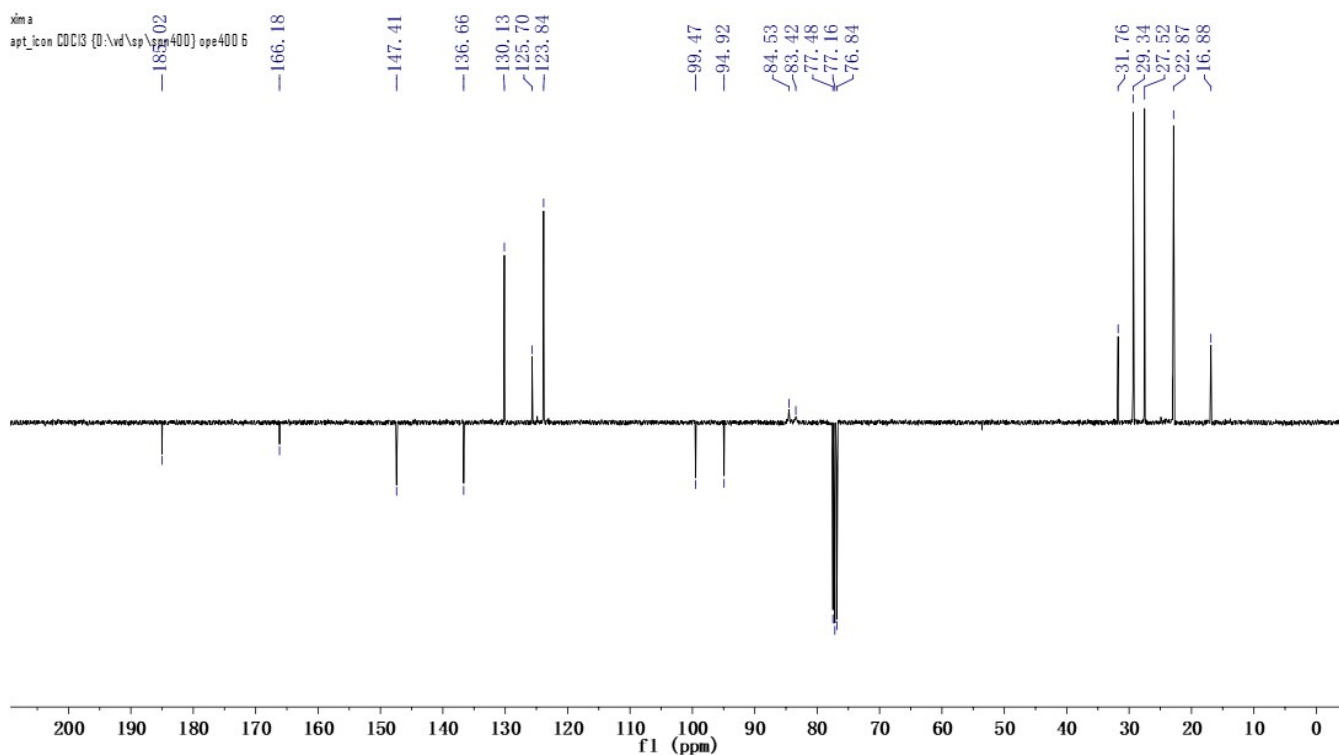

$^1\text{H}$  and  $^{13}\text{C}$   $\{^1\text{H}\}$  apt NMR of  $[\text{Ru}(\text{CO}_3)(\text{IMes})(p\text{-cymene})]$  (**3b**)

# SUPPORTING INFORMATION

xima  
 protbn\_icon CDCl3 (D:\vd\sp\spn400) ope400 5

7.26  
 7.00  
 7.00

5.29  
 5.15  
 5.14  
 4.81  
 4.80

2.34  
 2.20  
 1.72  
 1.70  
 1.69  
 1.67  
 1.65  
 1.63  
 0.83  
 0.82

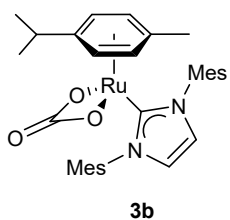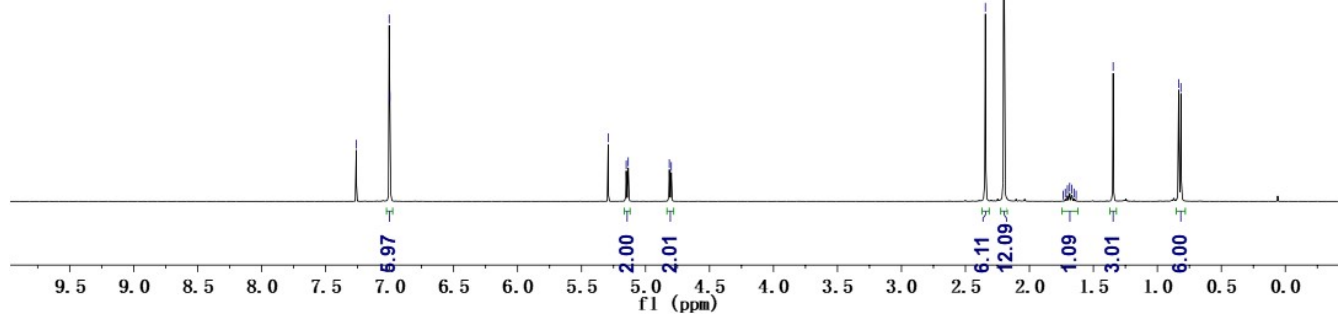

xima  
 apt\_icon CDCl3 (D:\vd\sp\spn400) ope400 5

180.57  
 166.39

139.05  
 136.65  
 128.97  
 124.71

99.89  
 95.03  
 84.99  
 83.78  
 77.48  
 77.16  
 76.84

32.00  
 23.47  
 21.12  
 18.70  
 16.92

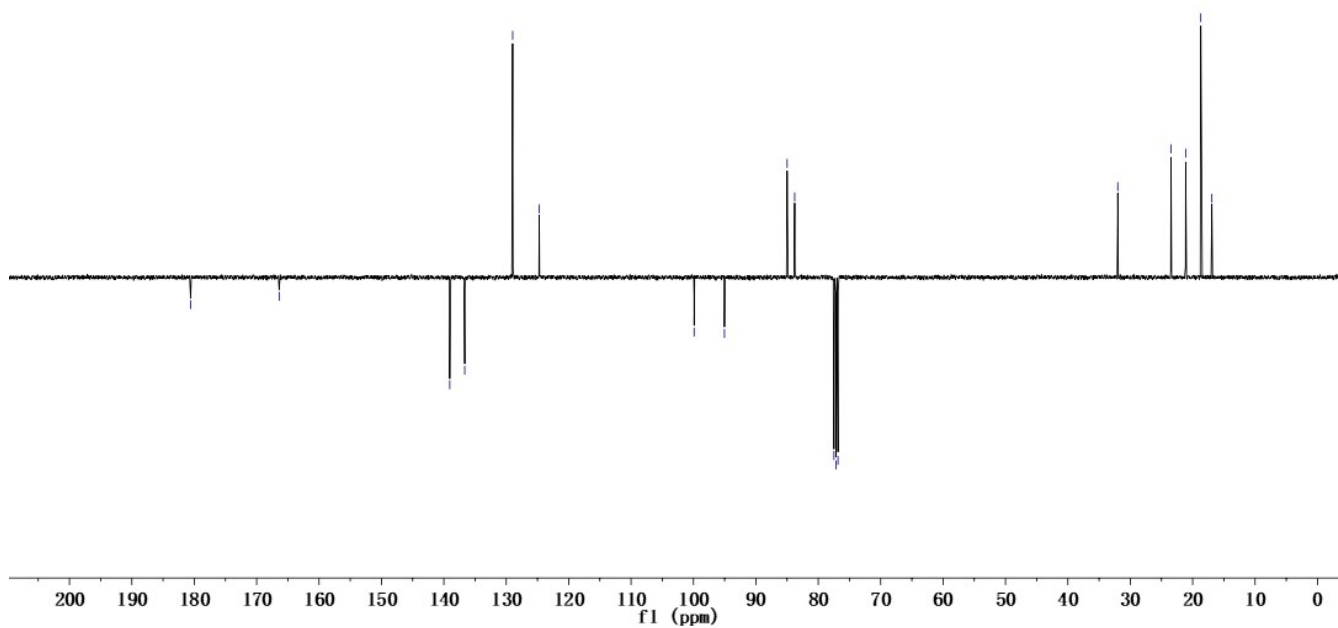

# SUPPORTING INFORMATION

## $^1\text{H}$ and $^{13}\text{C}$ $\{^1\text{H}\}$ apt NMR of $[\text{Ru}(\text{CO}_3)(\text{SiMes})(p\text{-cymene})]$ (**3c**)

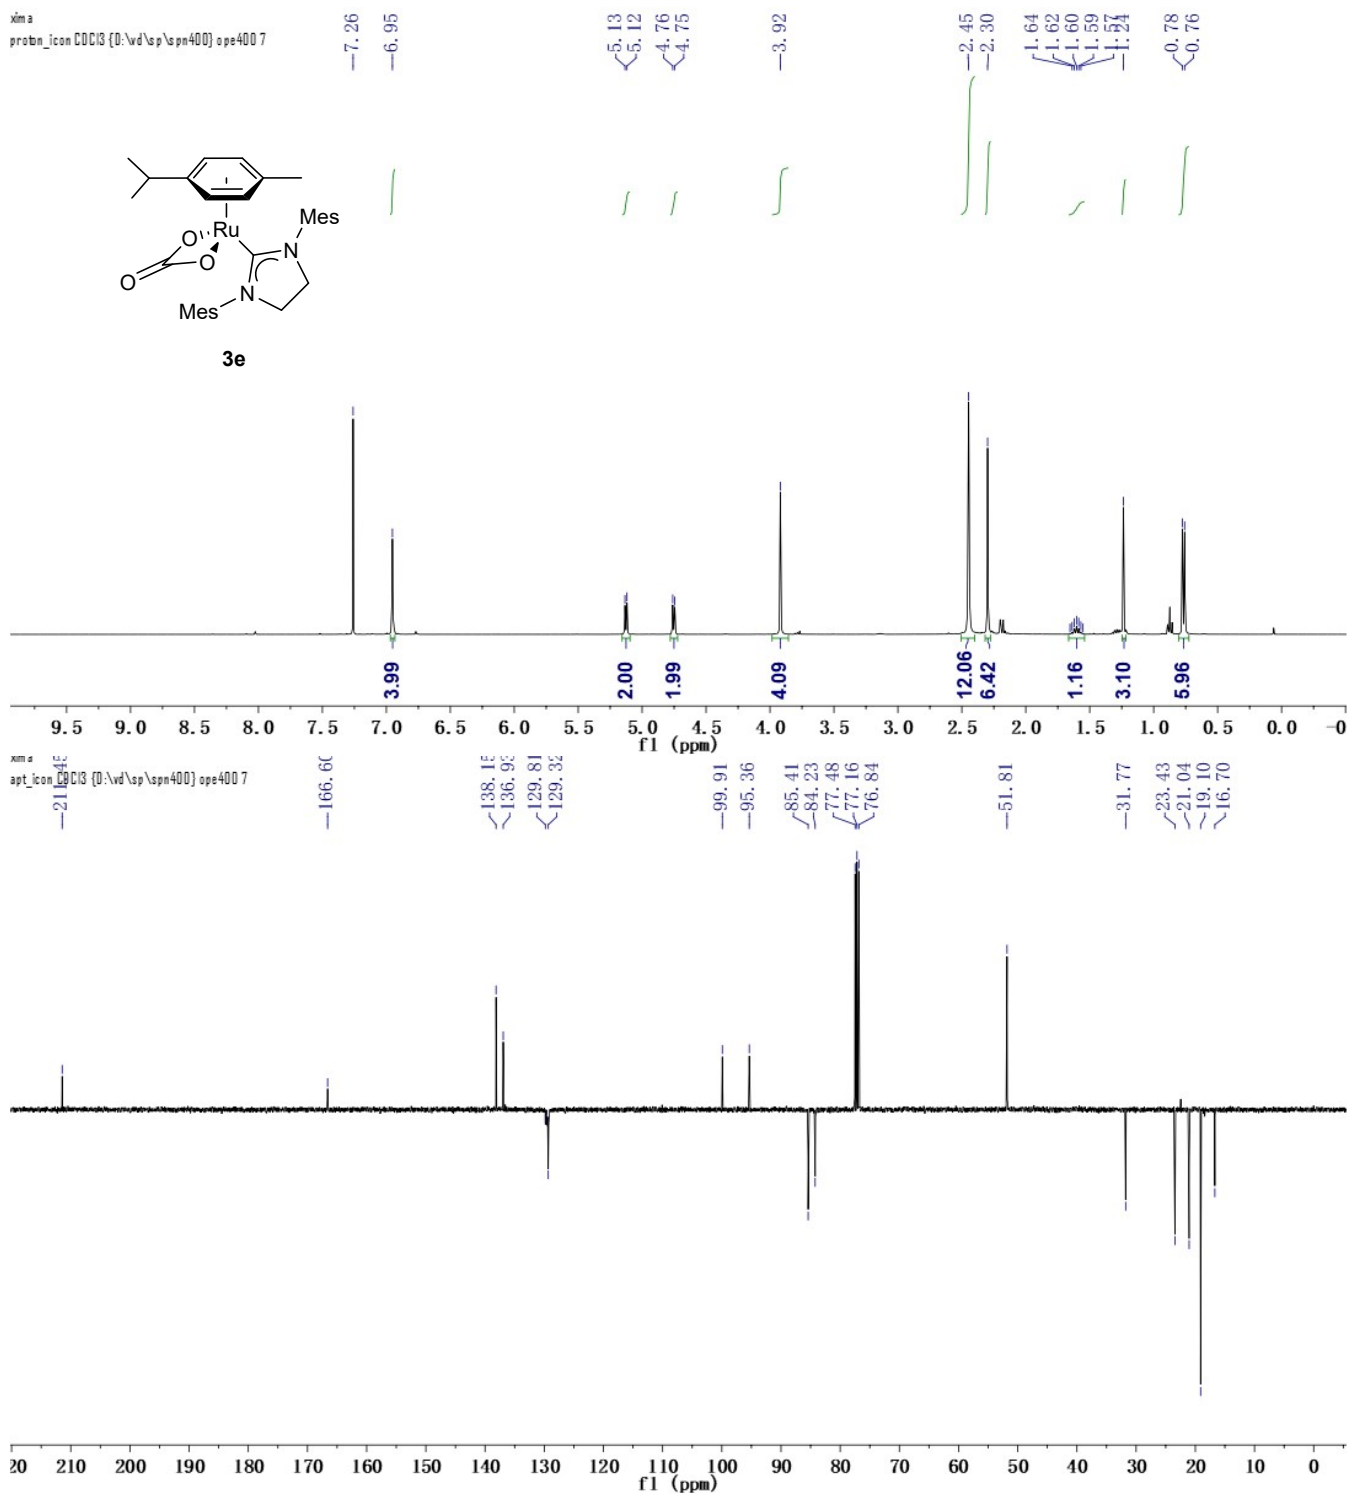



# SUPPORTING INFORMATION

## $^1\text{H}$ and $^{13}\text{C}$ { $^1\text{H}$ } apt NMR of $[\text{Ru}(\text{CO}_3)(\text{ICy})(p\text{-cymene})]$ (**3d**)

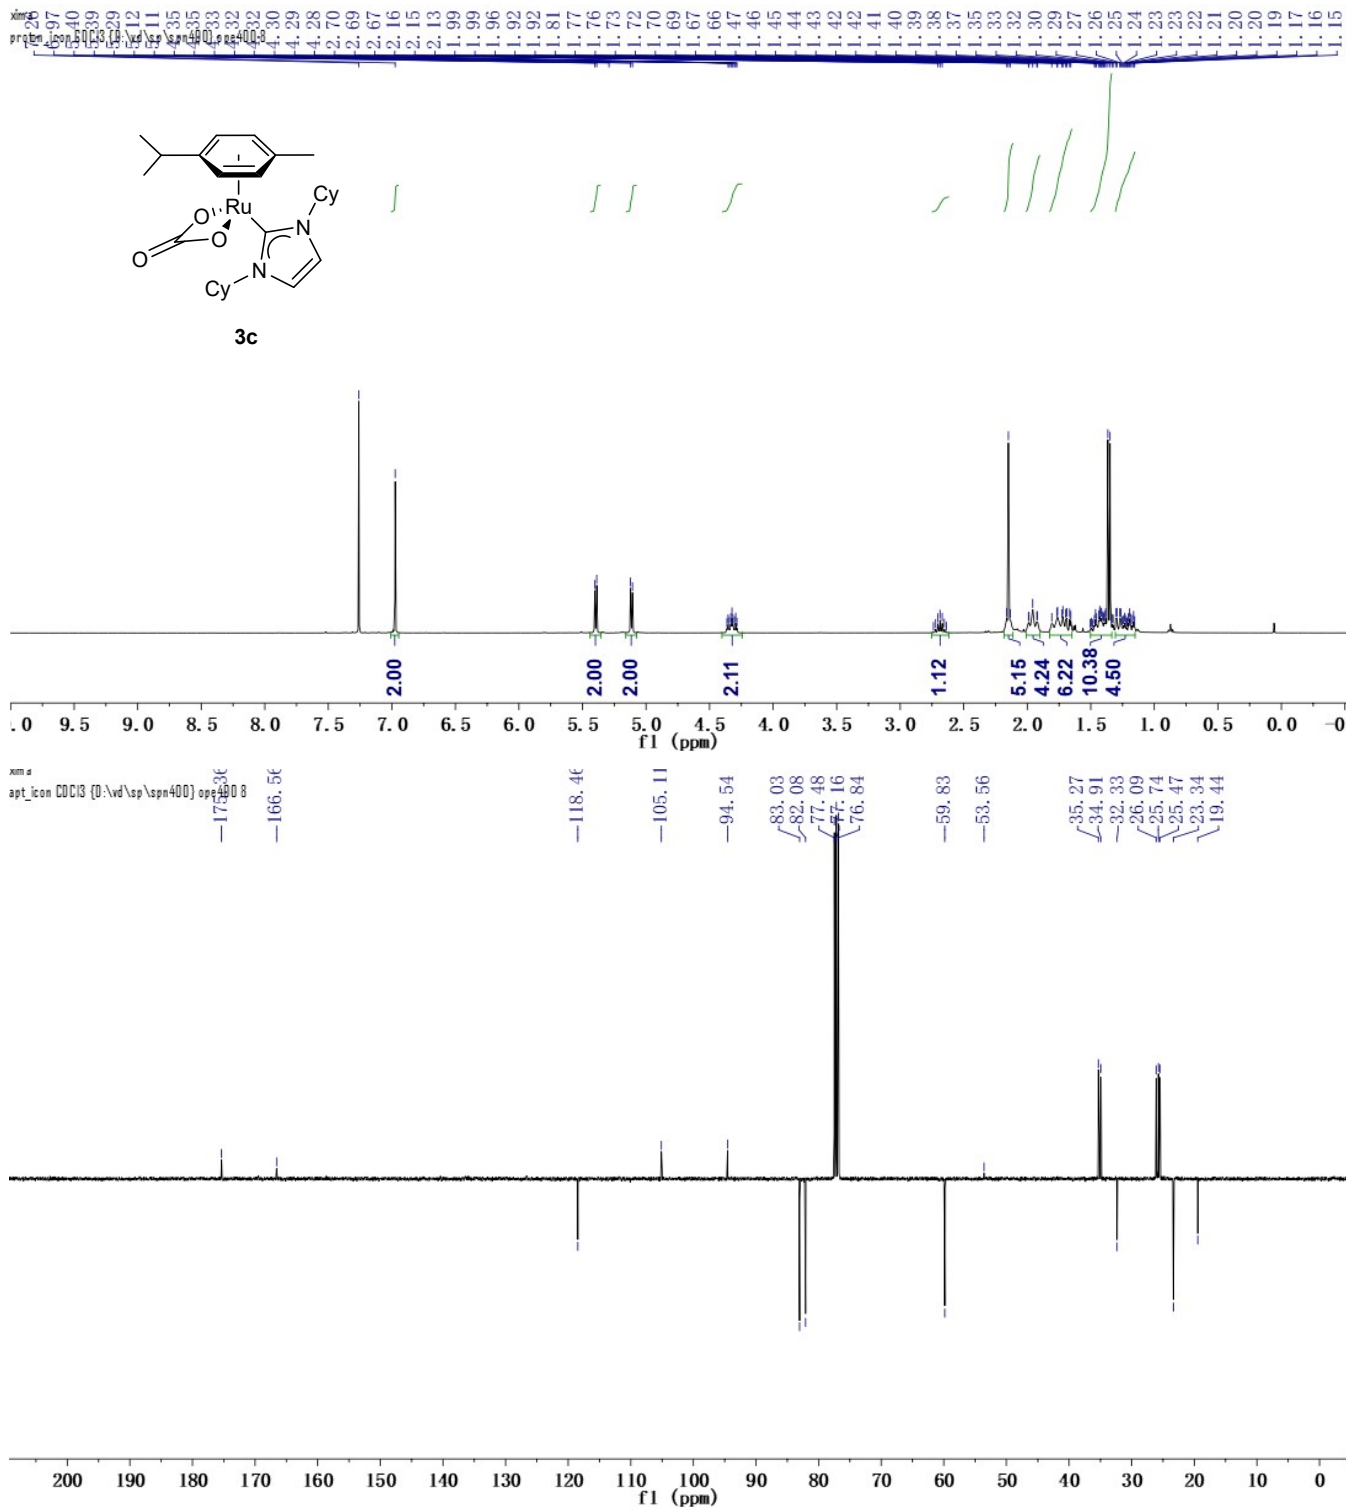

# SUPPORTING INFORMATION

## $^1\text{H}$ and $^{13}\text{C}$ { $^1\text{H}$ } apt NMR of $[\text{Ru}(\text{CO})_3(\text{IME})(p\text{-cymene})]$ (**3e**)

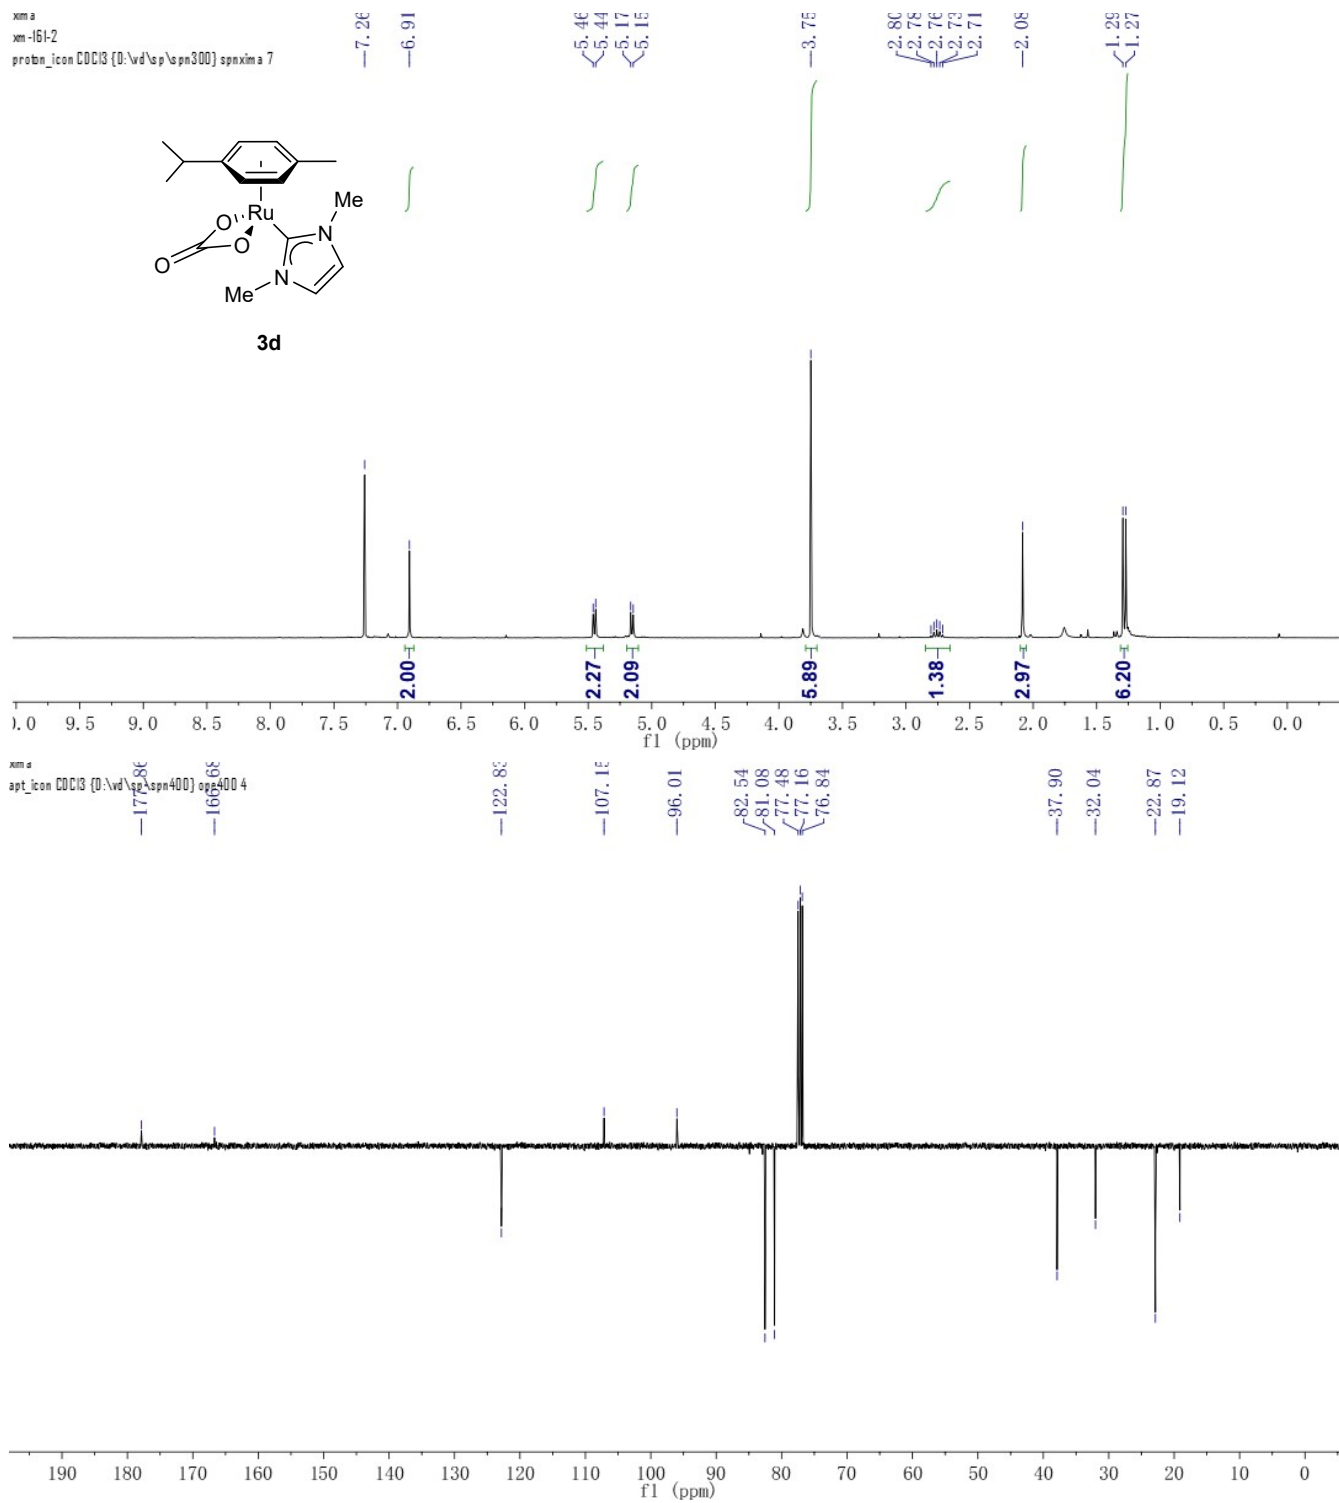

# SUPPORTING INFORMATION

## $^1\text{H}$ and $^{13}\text{C}$ { $^1\text{H}$ } apt NMR of $\alpha$ -Methylbenzenemethanol (**6a**)

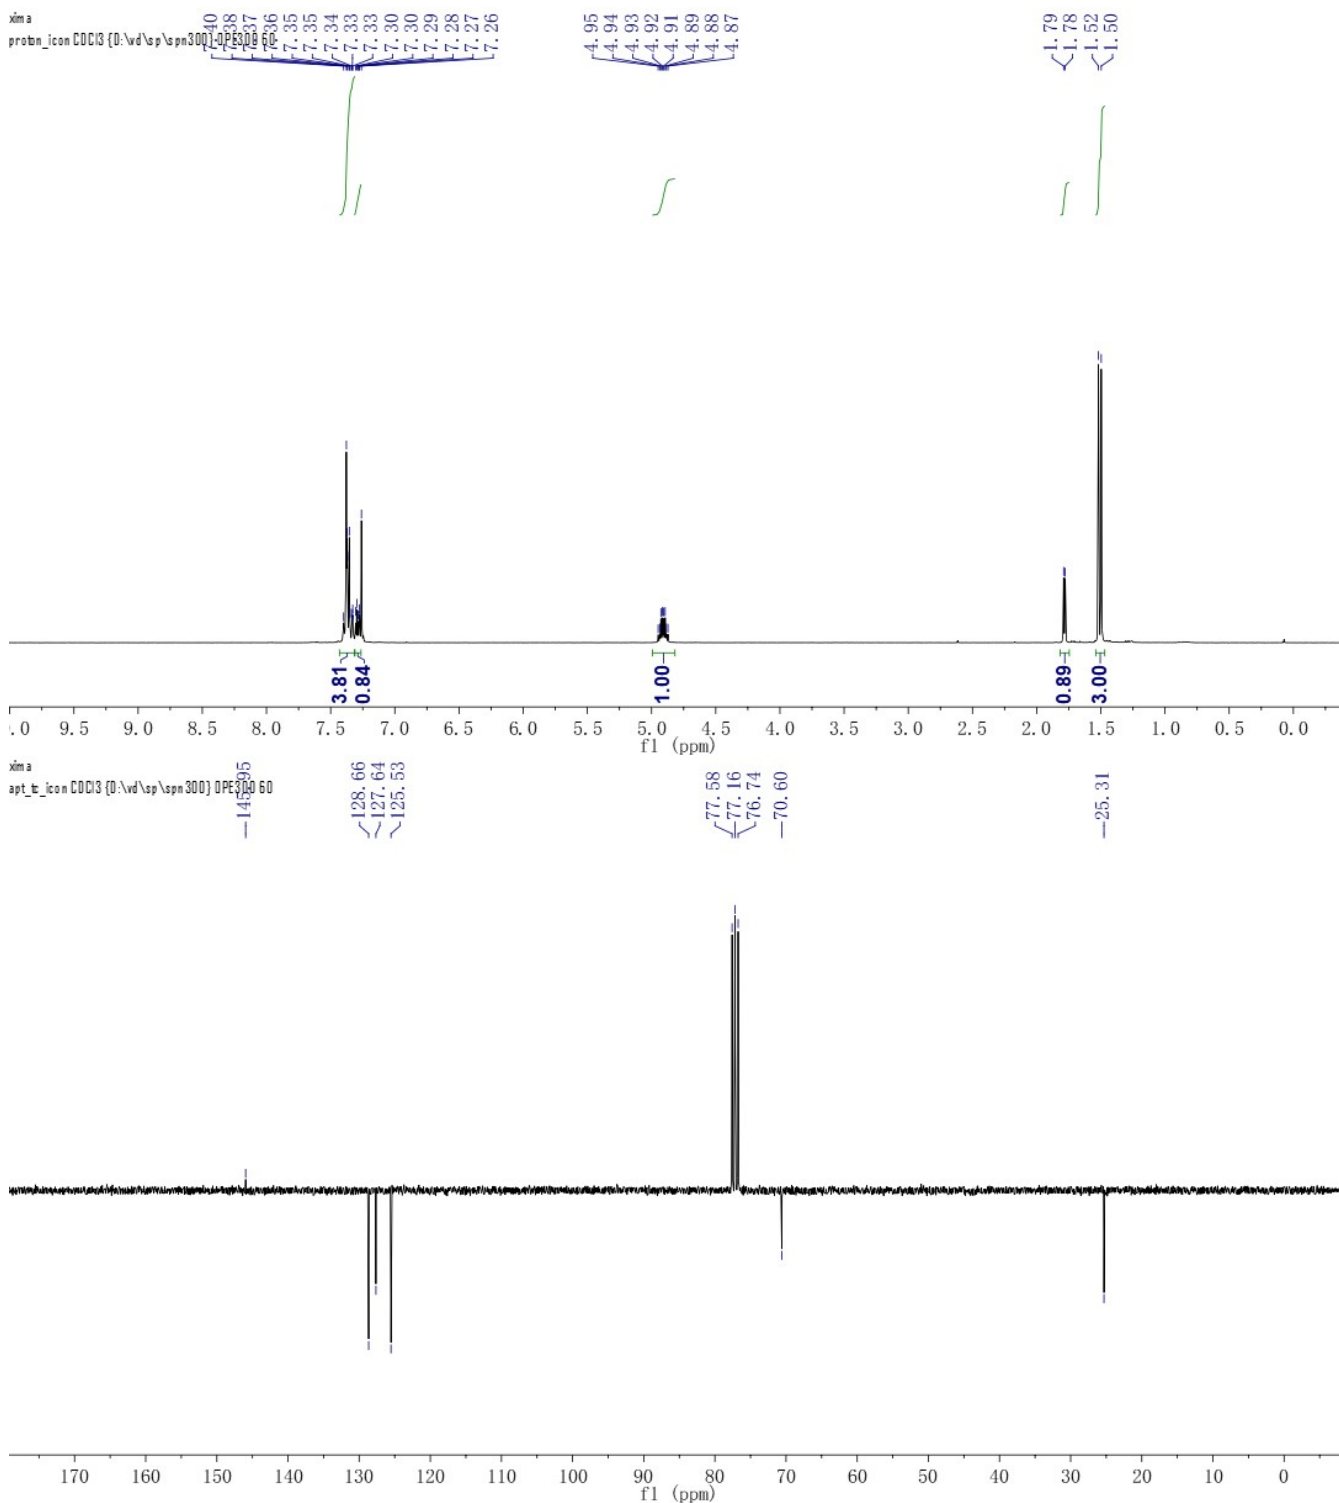

# SUPPORTING INFORMATION

## $^1\text{H}$ and $^{13}\text{C}$ $\{^1\text{H}\}$ apt NMR of 4-chlorobenzenemethanol (**6b**)

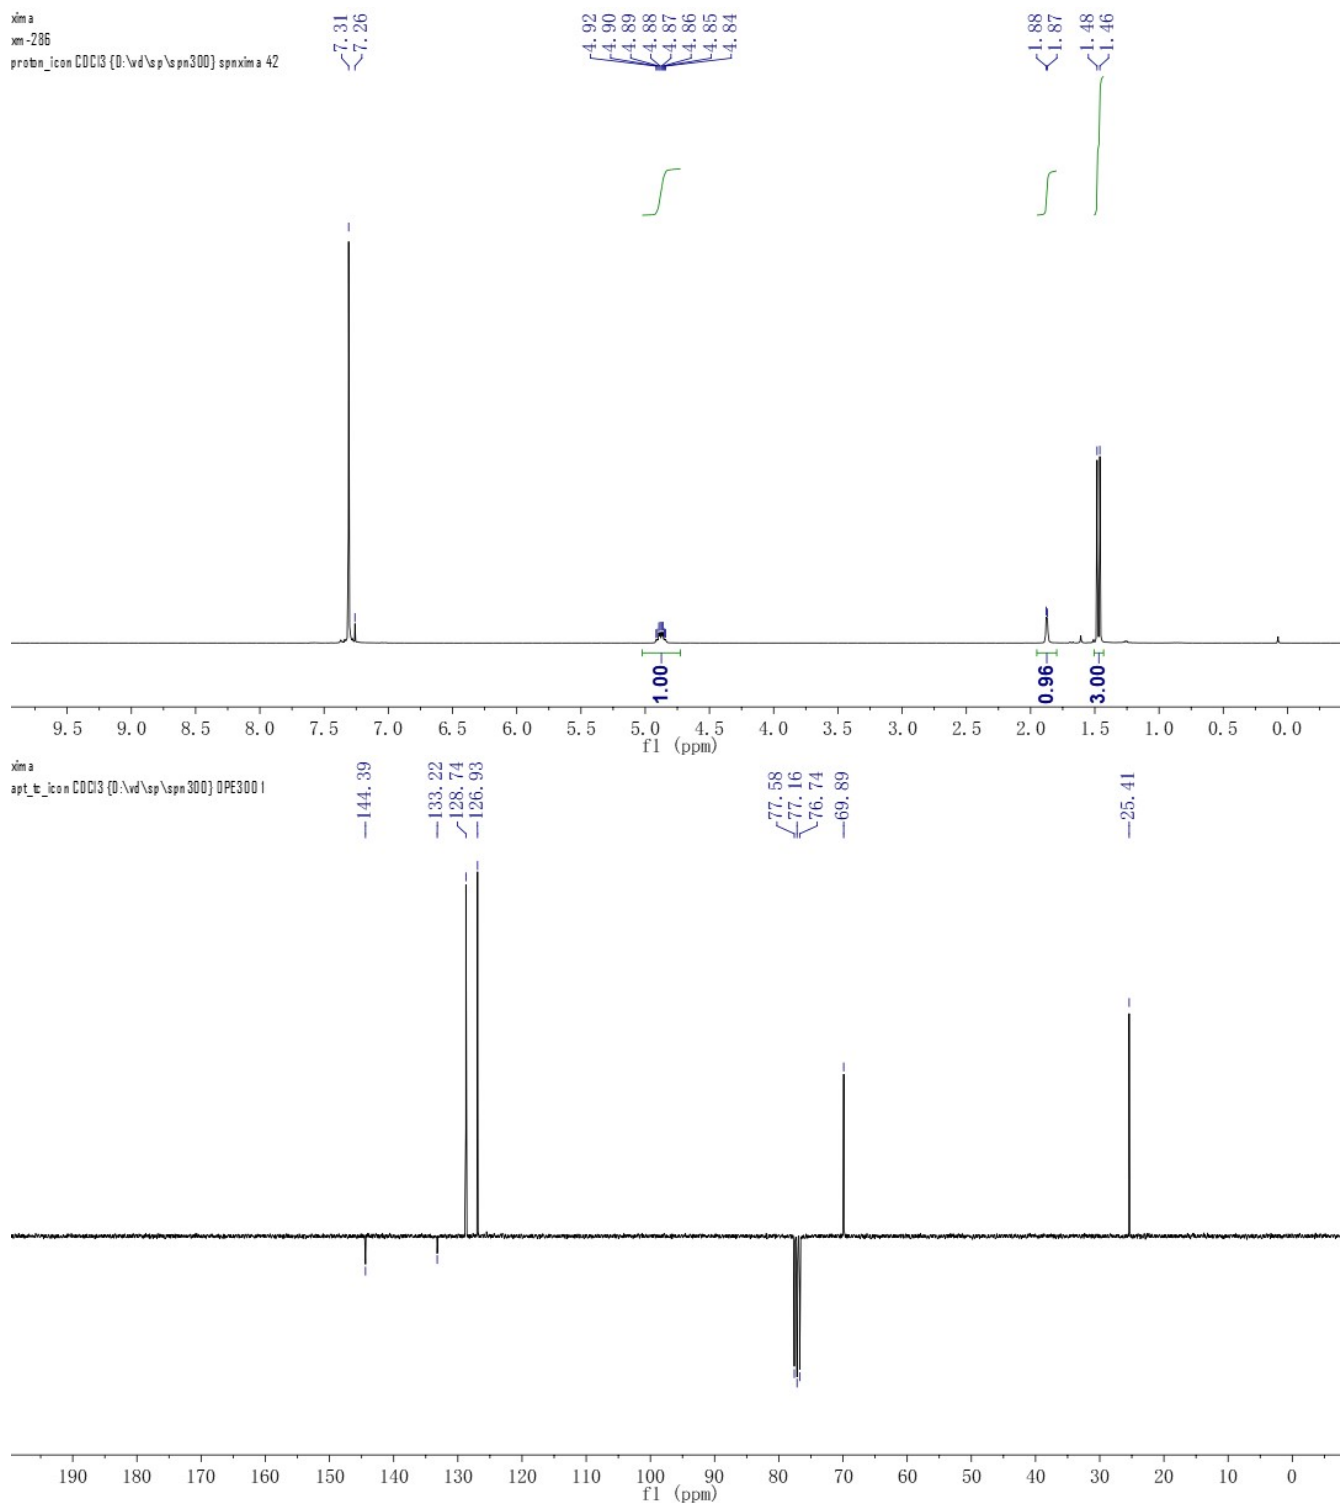

# SUPPORTING INFORMATION

## $^1\text{H}$ and $^{13}\text{C}$ $\{^1\text{H}\}$ apt NMR of 4-Methoxy- $\alpha$ -methylbenzyl alcohol (**6c**)

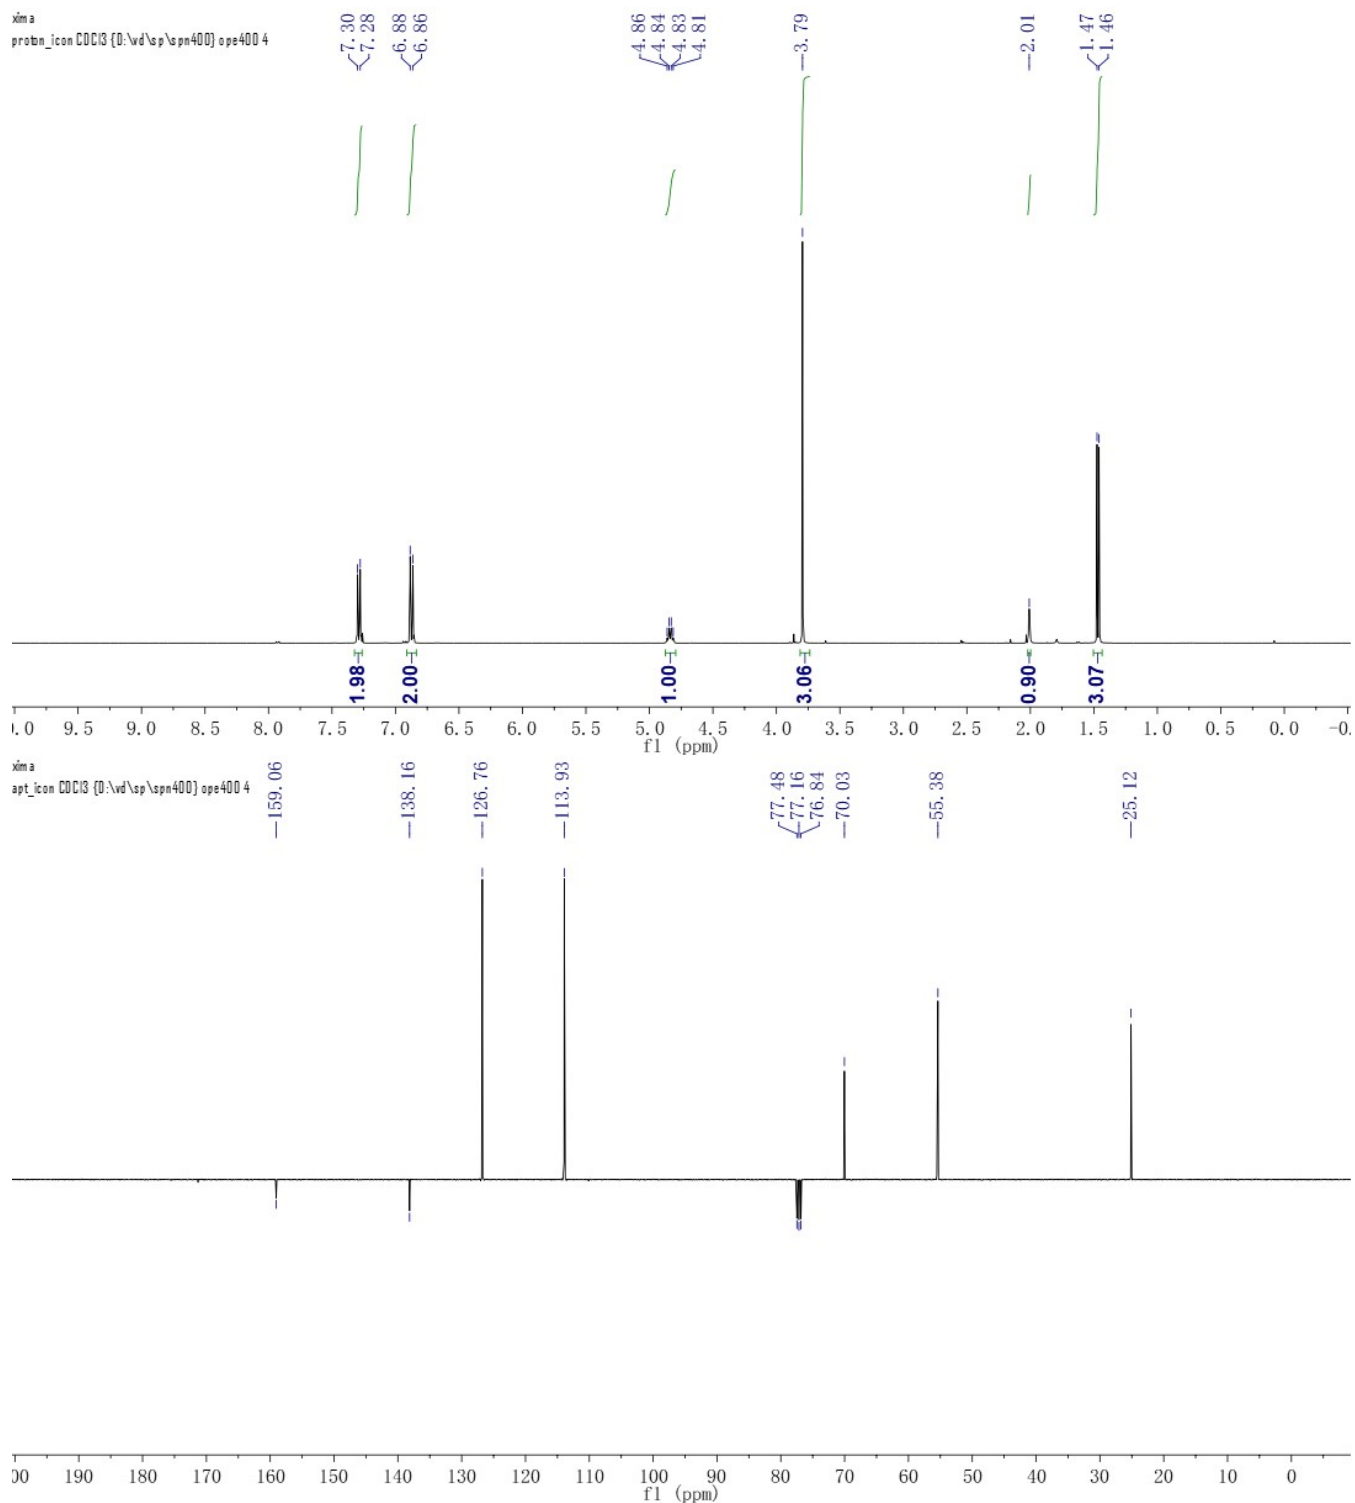

# SUPPORTING INFORMATION

## $^1\text{H}$ and $^{13}\text{C}$ $\{^1\text{H}\}$ apt NMR of Diphenylmethanol (**6d**)

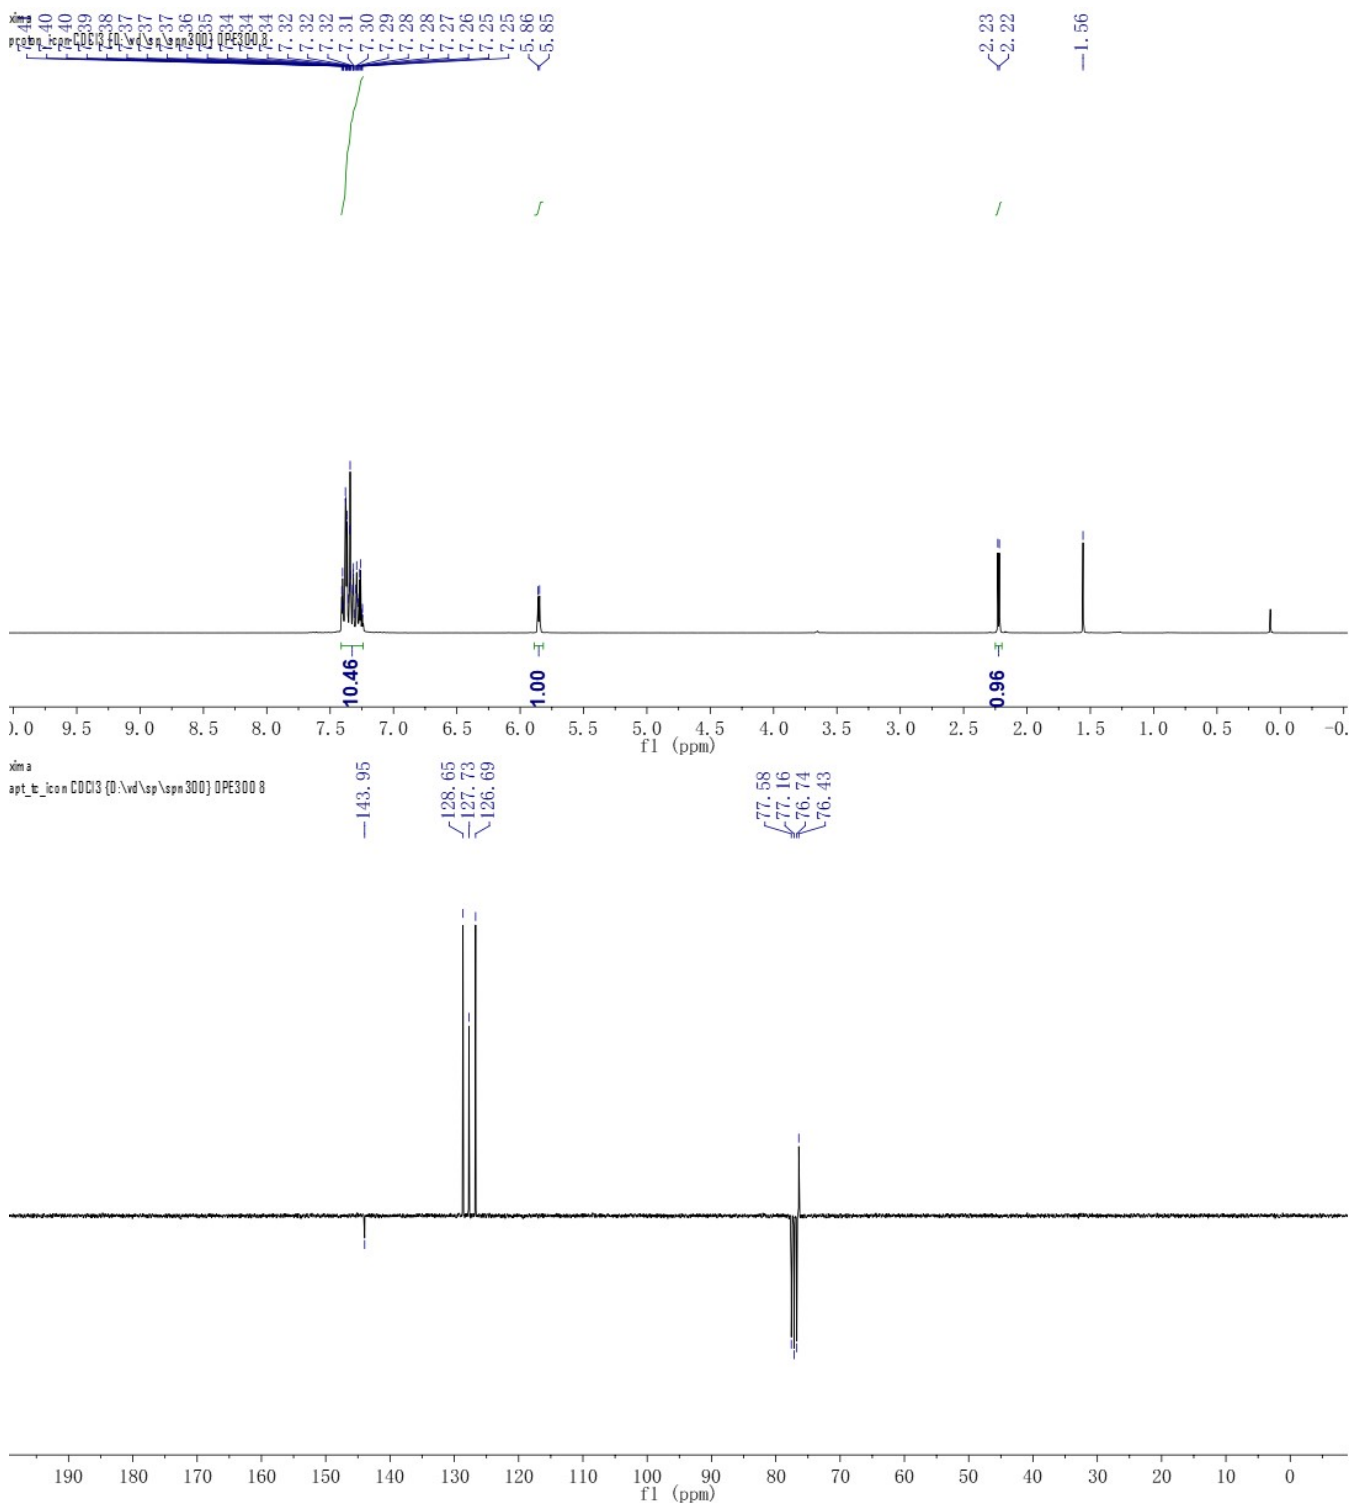

# SUPPORTING INFORMATION

## $^1\text{H}$ and $^{13}\text{C}$ $\{^1\text{H}\}$ apt NMR of 4,4'-Dimethylbenzhydrol (**6e**)

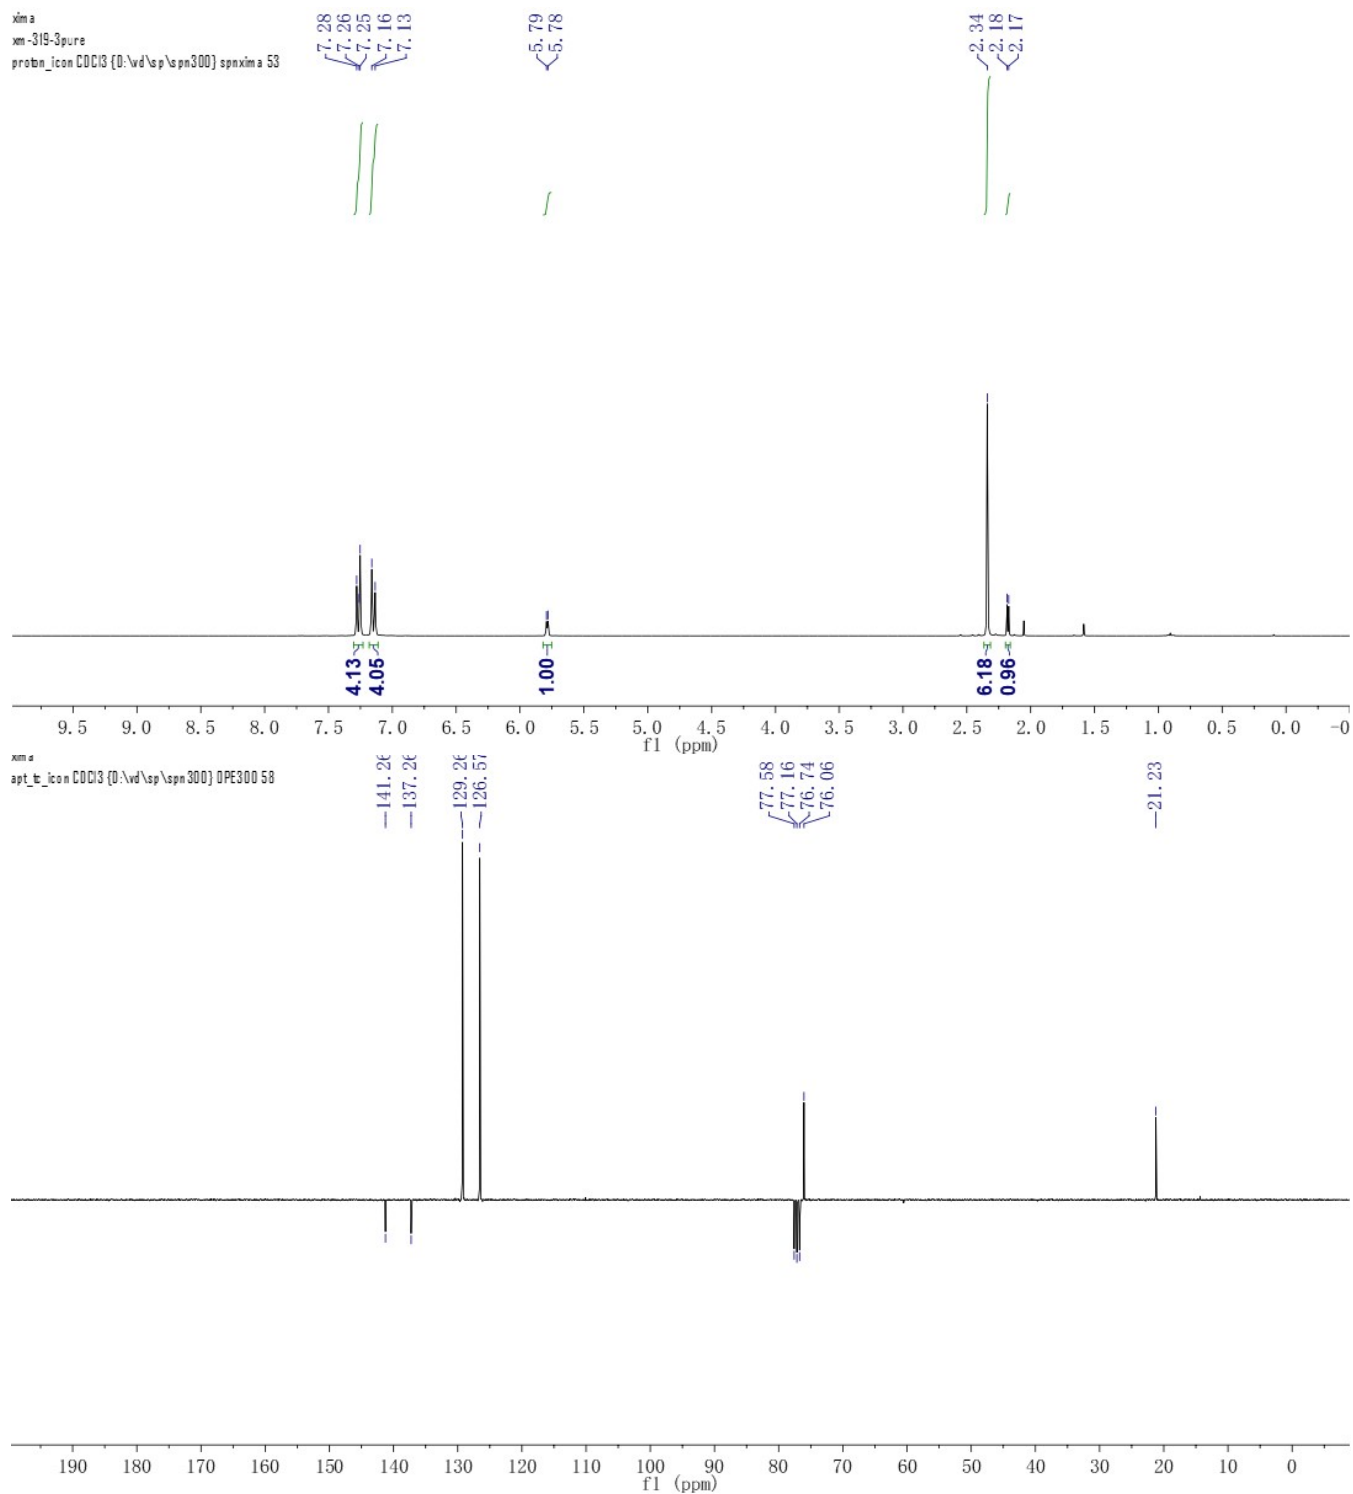

# SUPPORTING INFORMATION

## $^1\text{H}$ and $^{13}\text{C}$ $\{^1\text{H}\}$ apt NMR of 4,4'-Dimethoxybenzhydrol (**6f**)

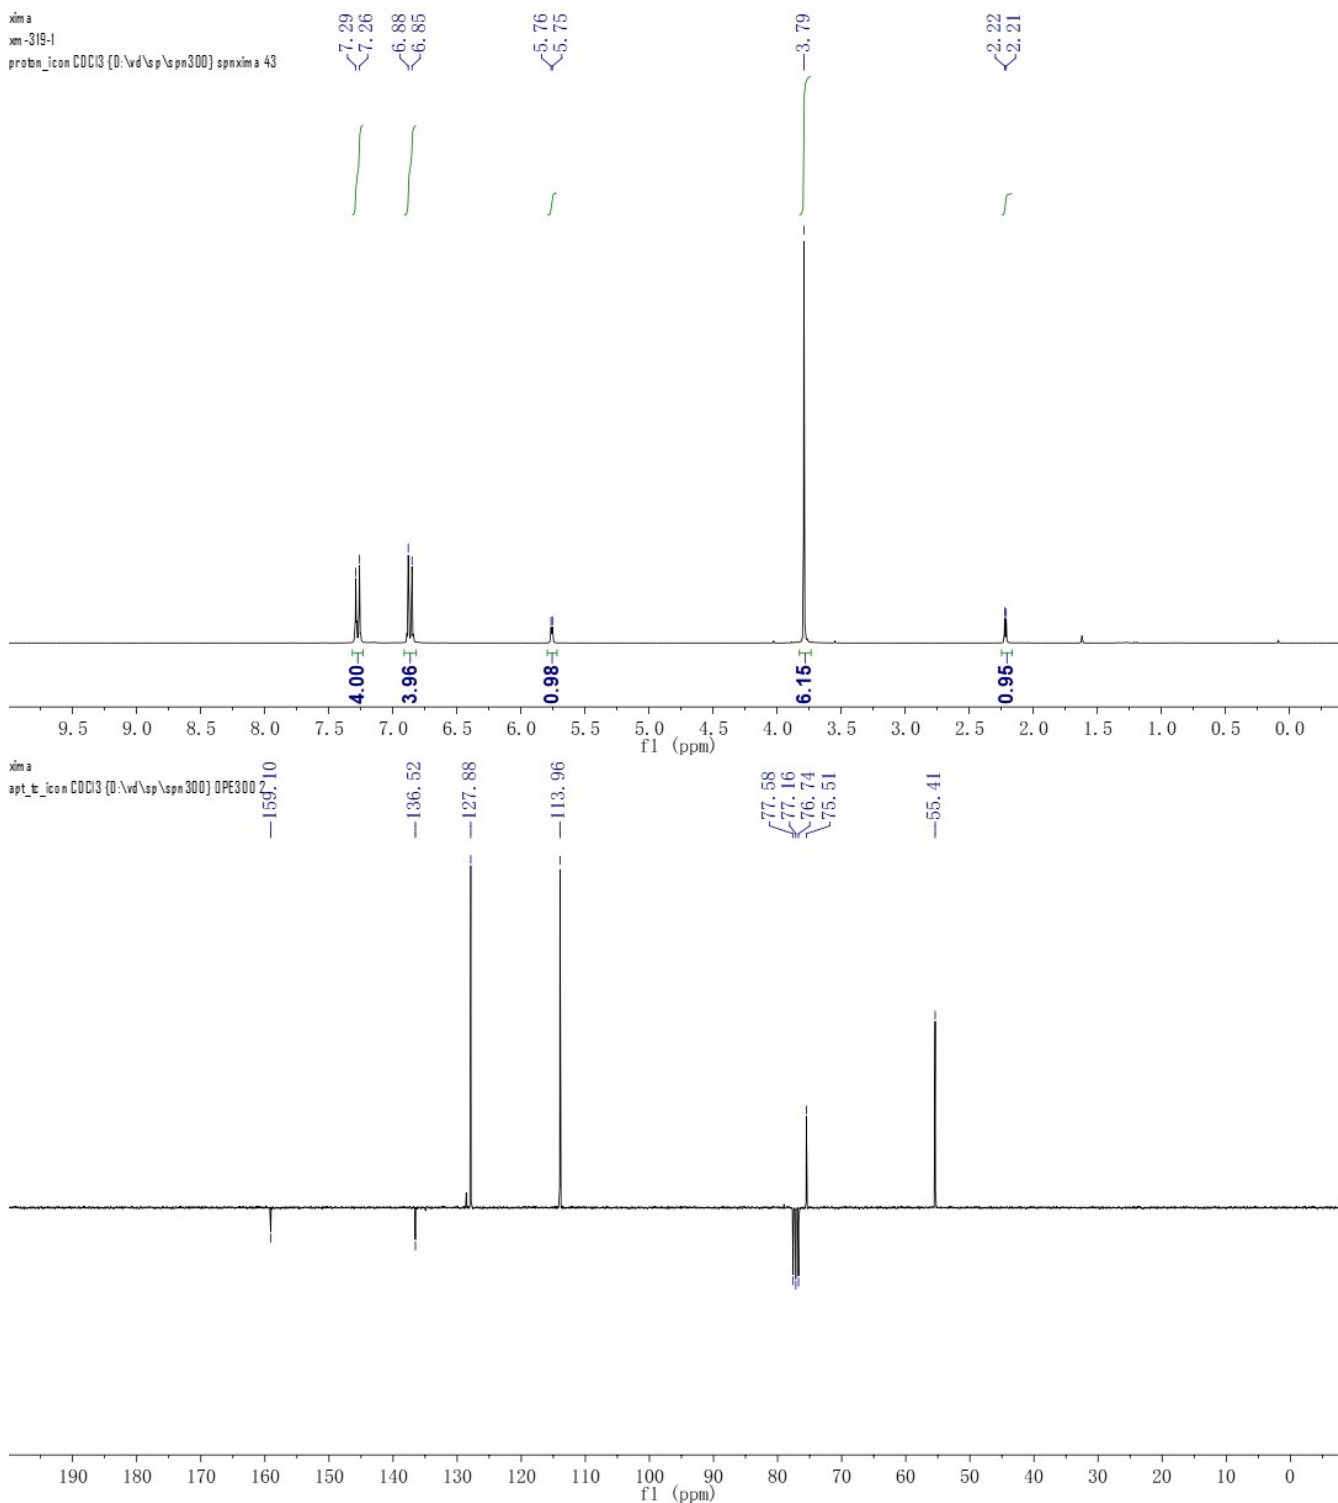



# SUPPORTING INFORMATION

## $^1\text{H}$ and $^{13}\text{C}$ { $^1\text{H}$ } apt NMR of 4, 4'-Difluorobenzhydrol (**6g**)

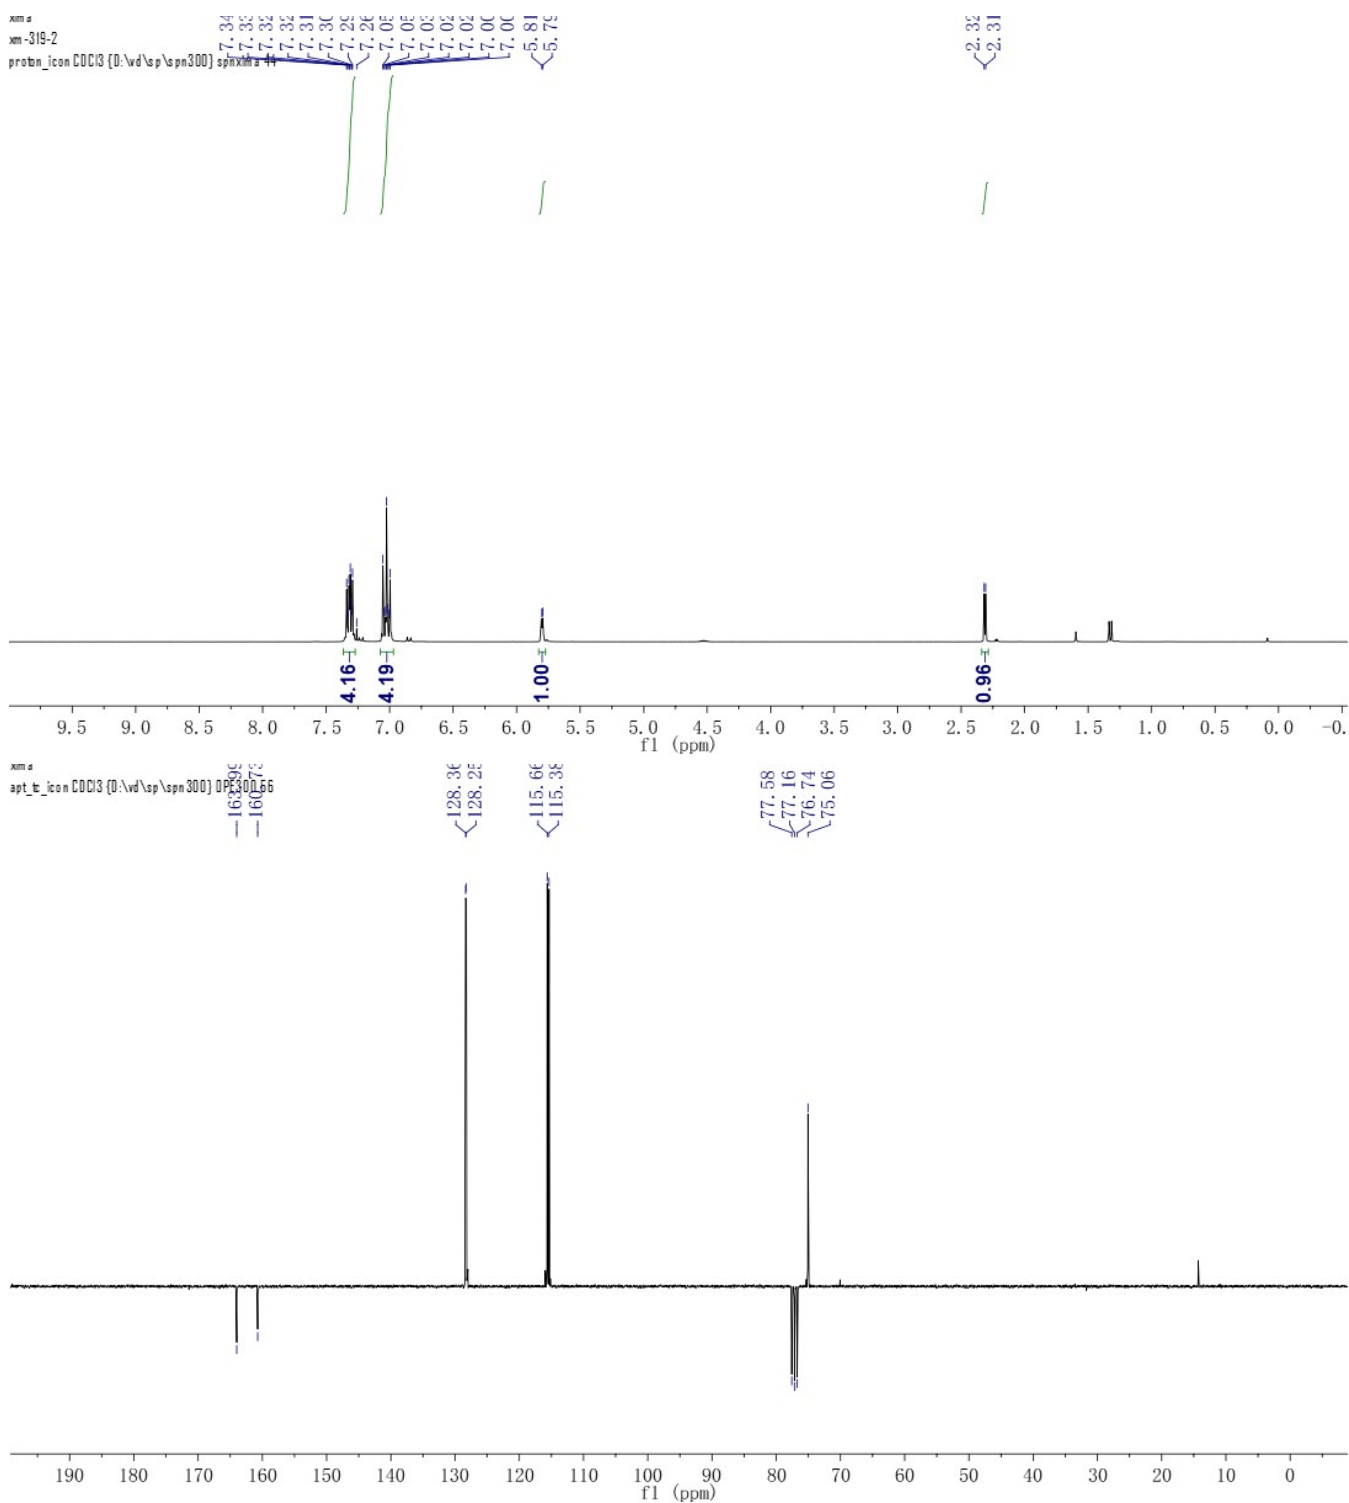

## SUPPORTING INFORMATION

---

### References

1. O. D. Bakulina, M. Yu. Ivanov, S. A. Prikhod'ko, S. Pylaeva, I. V. Zaytseva, N. V. Surovtsev, N. Y. Adonin and M. V. Fedin, *Nanoscale*, **2020**, *12*, 19982–19991.
